# Supplementary material for: Multi-decadal offshore wind power variability can be mitigated through optimized European allocation
Source: Copernicus journal article supplement (doi:10.5194/adgeo-54-205-2021), 2021-03-05
Supplement: Supplementary file 1 [file adgeo-54-205-2021-supplement.pdf]

Supplement of Adv. Geosci., 54, 205–215, 2021  
<https://doi.org/10.5194/adgeo-54-205-2021-supplement>  
© Author(s) 2021. This work is distributed under  
the Creative Commons Attribution 4.0 License.

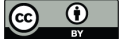

*Supplement of*

## **Multi-decadal offshore wind power variability can be mitigated through optimized European allocation**

**Charlotte Neubacher et al.**

*Correspondence to:* Charlotte Neubacher (c.neubacher@fz-juelich.de)

The copyright of individual parts of the supplement might differ from the CC BY 4.0 License.

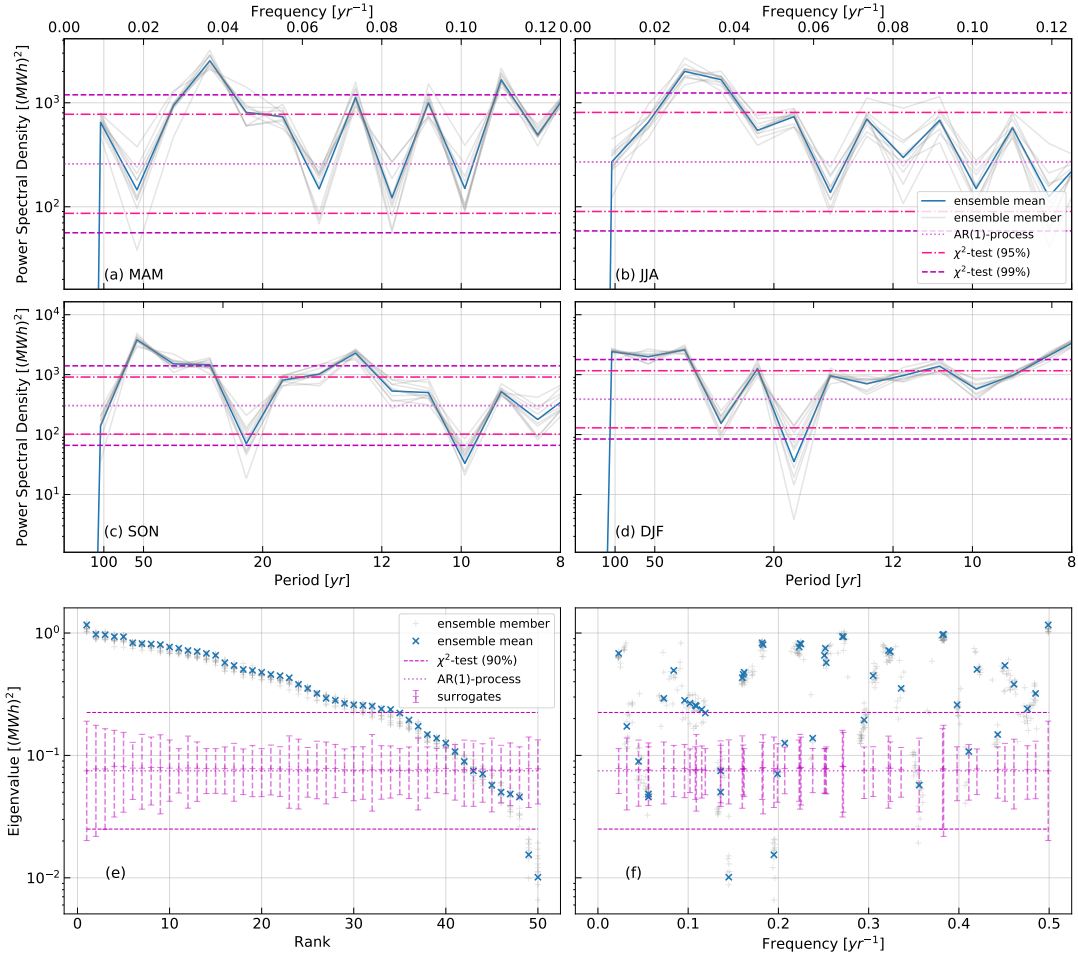

Figure S1: Spectra of wind power potential for German North Sea. The panels (a)-(d) show the PSD of each season (blue denotes ensemble mean, gray ensemble members). The confidence level of 95% (dashed) and 99% (dash-dotted) is given. The panels (e) and (f) show the eigenspectrum of SSA (blue denotes ensemble mean, gray ensemble members). Eigenvalues are ordered by rank in (e) and by frequency in (f) with confidence interval given by the inner 90% of the surrogates and a  $\chi^2$ -test(90%).

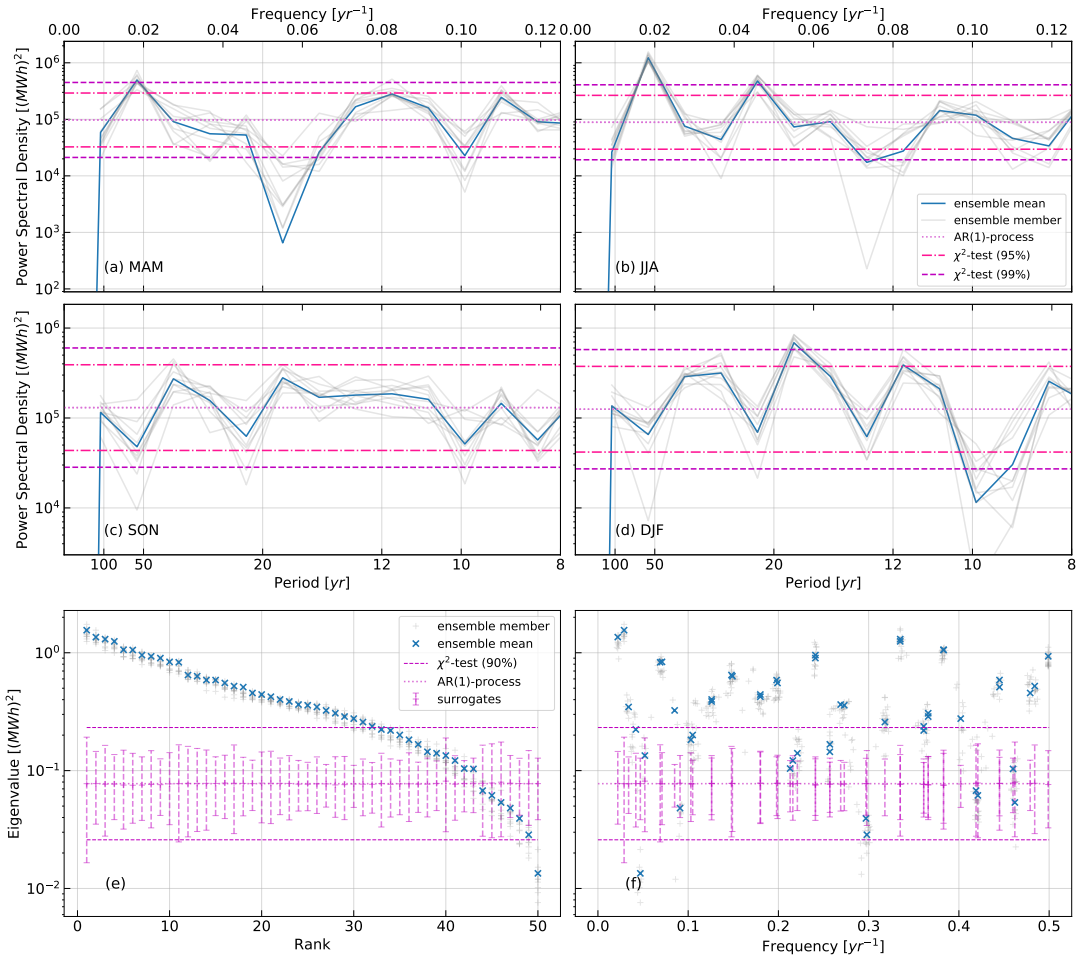

Figure S2: Spectra of wind power potential for Greek Mediterranean. The panels (a)-(d) show the PSD of each season (blue denotes ensemble mean, gray ensemble members). The confidence level of 95% (dashed) and 99% (dash-dotted) is given. The panels (e) and (f) show the eigenspectrum of SSA (blue denotes ensemble mean, gray ensemble members). Eigenvalues are ordered by rank in (e) and by frequency in (f) with confidence interval given by the inner 90% of the surrogates and a  $\chi^2$ -test(90%).
